# Supplementary material
Source: PubMed Central journal article supplement (PMC3805313)
Supplement: am402756d_si_001.pdf [file am402756d_si_001.pdf]

**Supporting Information for:**

**Fabrication of Smooth Patterned Structures of  
Refractory Metals, Semiconductors, and Oxides  
via Template Stripping**

*Jong Hyuk Park,<sup>†,‡,+</sup> Prashant Nagpal,<sup>‡</sup> Kevin M. McPeak,<sup>†</sup> Nathan C. Lindquist,<sup>§</sup>*

*Sang-Hyun Oh,<sup>§</sup> and David J. Norris<sup>†,\*</sup>*

<sup>†</sup> Optical Materials Engineering Laboratory, ETH Zurich, 8092 Zurich, Switzerland.

<sup>‡</sup> Department of Chemical Engineering and Materials Science, University of Minnesota,  
Minneapolis, Minnesota 55455, USA.

<sup>+</sup> Photo-Electronic Hybrids Research Center, Korea Institute of Science and Technology,  
Seoul, 136-791, South Korea.

<sup>§</sup> Department of Electrical and Computer Engineering, University of Minnesota, Minneapolis,  
Minnesota 55455, USA.

## Supplemental Figures

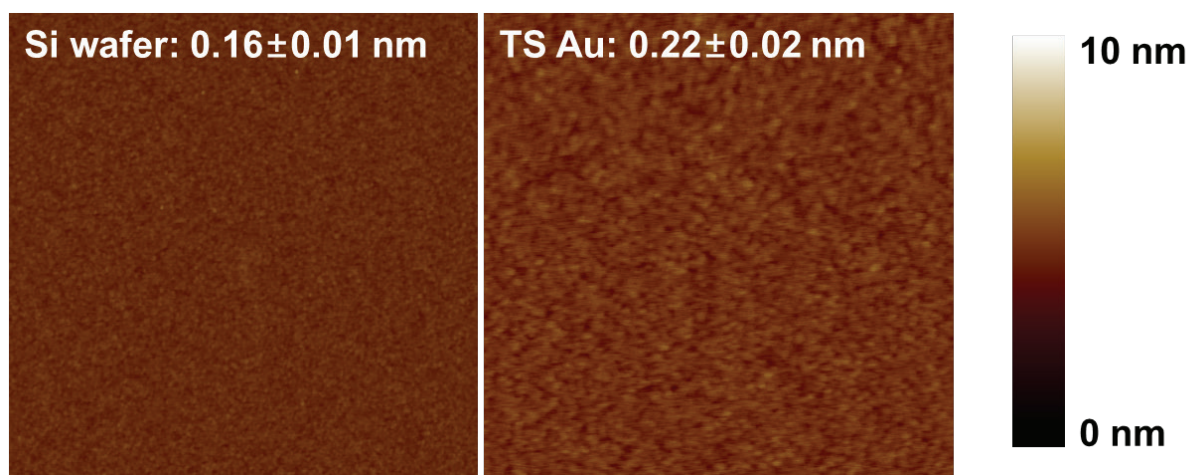

**Figure S1.** AFM images of the silicon (Si) wafer (left panel) and a gold (Au) film template-stripped (TS) from it (right panel). For each surface the root-mean-square roughness is provided: 0.16 and 0.22 nm, respectively. The Au film is 20 nm thick. The scanned areas are  $2.5 \times 2.5 \mu\text{m}^2$ .

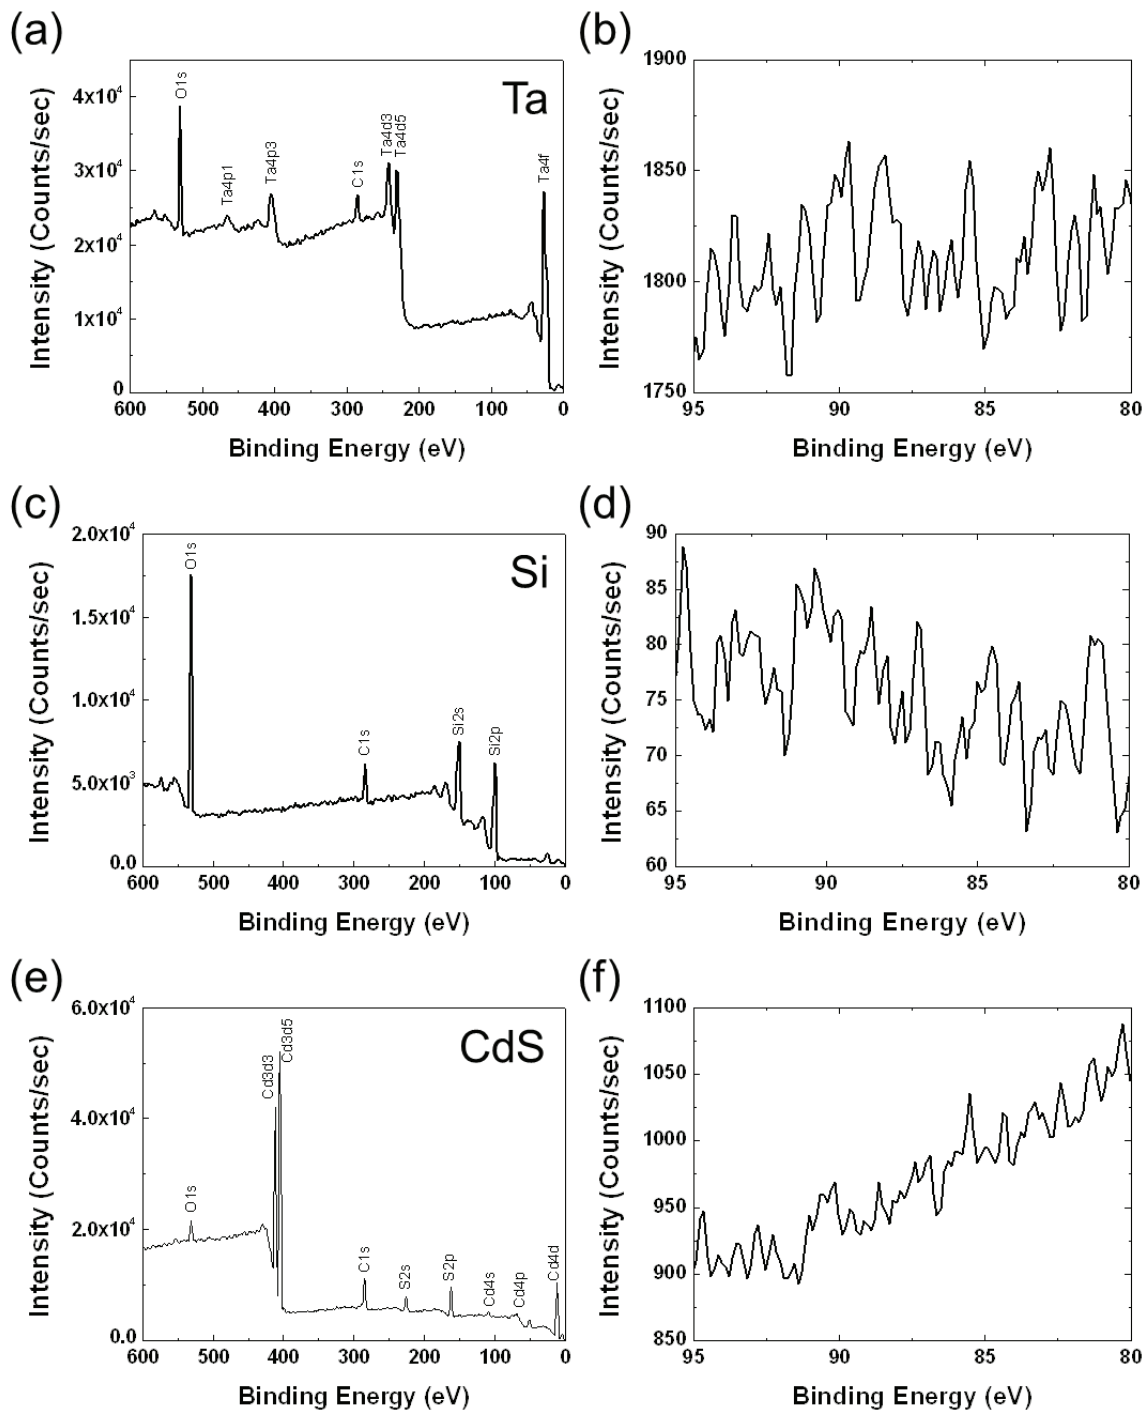

**Figure S2.** XPS spectra for the template-stripped surfaces of tantalum (Ta), silicon (Si), and cadmium sulfide (CdS) films. A wide-scan survey spectrum of the template-stripped (a) Ta, (c) Si, and (e) CdS films. Each image contains the peak annotation. A high-resolution spectrum of the template-stripped (b) Ta, (d) Si, and (f) CdS films for detecting Au 4f peaks. Au peaks were not observed.

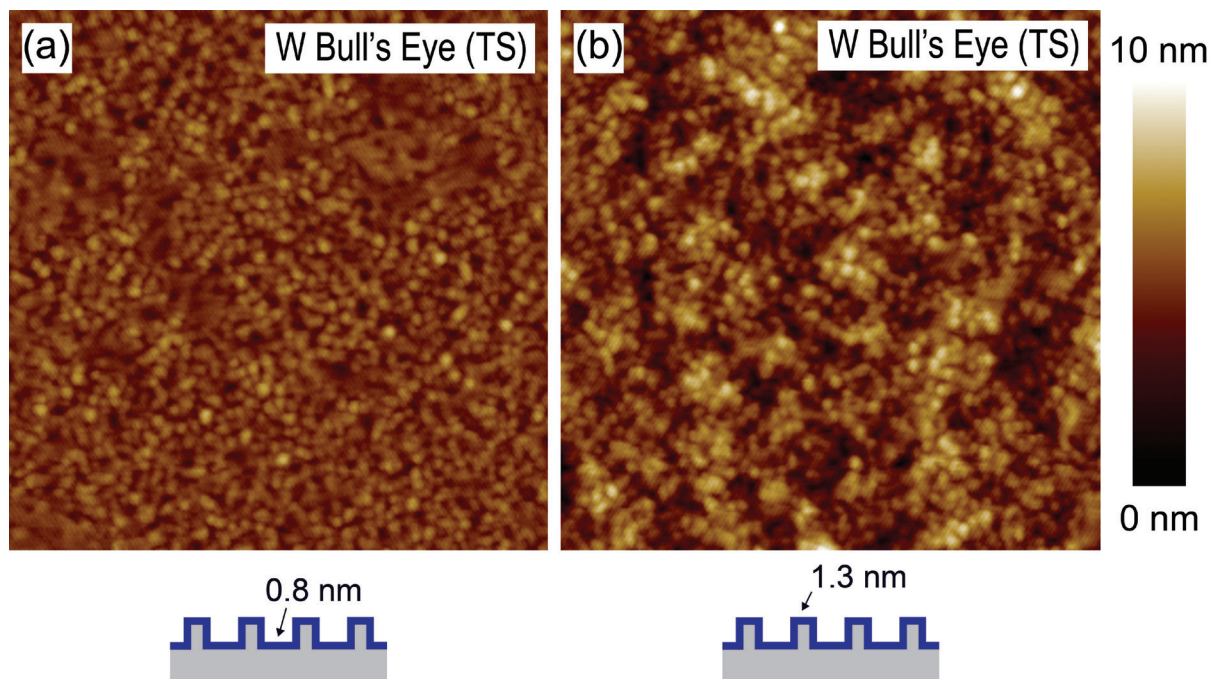

**Figure S3.** AFM images of template-stripped (TS) tungsten (W) bull's eye structures. The surfaces of (a) the groove and (b) the top flats were separately characterized. These surfaces exhibited a root-mean-square roughness of ca. 0.8 and 1.3 nm, respectively. The scanned areas are  $1 \times 1 \mu\text{m}^2$ .

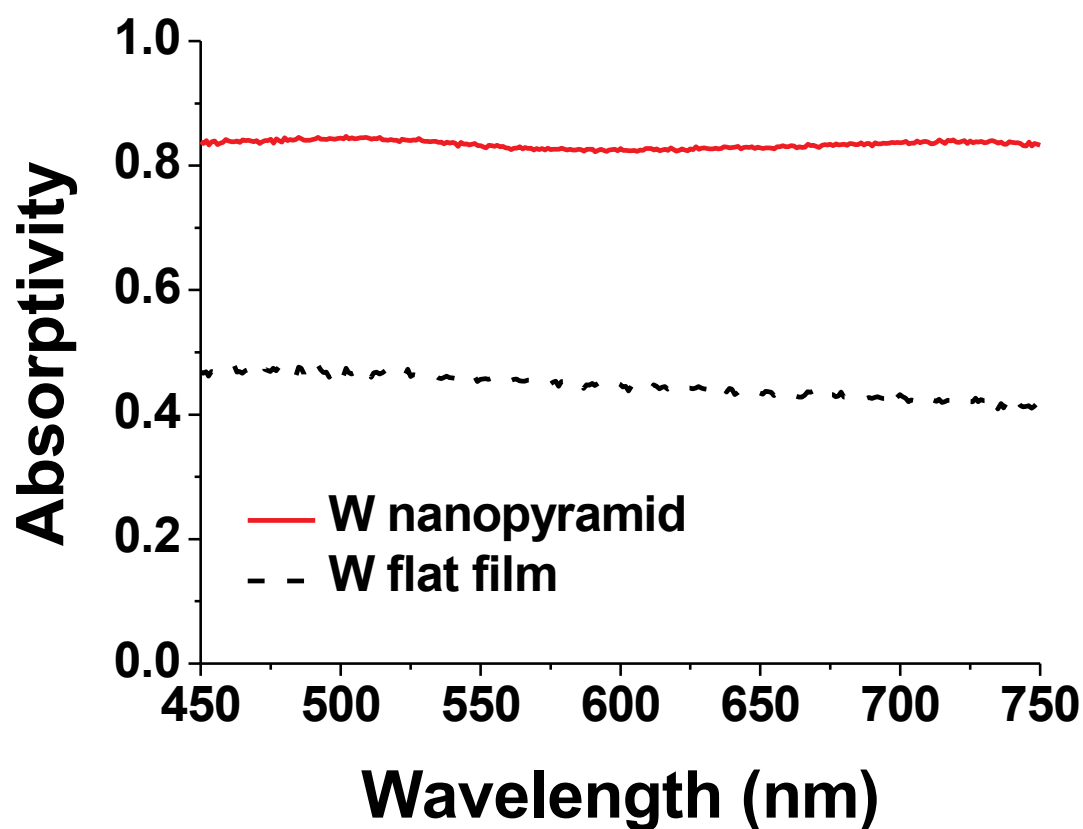

**Figure S4.** Absorption spectra for tungsten (W) nanopyramid films fabricated by template stripping and flat tungsten films. Here, absorptivity is estimated from  $1-R$ , where  $R$  is the reflectivity. Thus, this neglects the effect of any high-angle scattering that is not collected by the high-numerical-aperture (0.9) objective used in the experiment.
